# Supplementary material
Source: PubMed Central journal article supplement (PMC515107)
Supplement: pnas_101_34_12622__1.pdf [file pnas_101_34_12622__1.pdf]

**Table 1. PCR primers used for the mouse IFN- $\gamma$  locus**

| Region amplified (actual position) | Primer name        | Sequence (5' → 3')                              |
|------------------------------------|--------------------|-------------------------------------------------|
| -14kb (-13.6kb)                    | CSE156<br>CSE136   | TGGATTGACAGAATGCCTCAT<br>TCTGAGCTTCCACTTCAATGG  |
| -11kb (-11.4kb)                    | CSE158<br>CSE138   | GAGCCACCGATGTCATAG<br>AGGCCGATGCCTAATGTC        |
| -8kb (-8.2kb)                      | CSE1511<br>CSE1311 | AAGACCATCAGAGGACACAGA<br>AAACCTTCAGTGCATGGGTCT  |
| CSE1 (-5.7kb)                      | IFN145<br>IFN143   | GTTACCTCCTCCACCCGTTCA<br>GACAGGACTATGACTCTCTAG  |
| -4kb (-4.5kb)                      | CSE351<br>CSE331   | TCATGACATGCTGTGCCTACG<br>ACTGCTGTCACTCAGTGCCTT  |
| -1.2kb                             | CSE353<br>CSE333   | GTACCACTCTGAGATGCTCAG<br>CTATGGGTGCAGACTTGAACC  |
| Promoter (-0.3kb)                  | IFN105<br>IFN103   | CATACCCTTTCCTTGCTTTTC<br>TTGTGGGATTCTCTGAAAGCA  |
| 3 <sup>rd</sup> intron (+1.96kb)   | IFN15<br>IFN23     | GTGTGTTAGTGGAAAGAGCAG<br>GATGTCTACTATTGCTTCGCC  |
| +6kb (+6.3kb)                      | CSE451<br>CSE431   | TGGGTTGTGAATTCAAGACTC<br>GTAACCACTGATTATGGCCAA  |
| +8kb (+8.1kb)                      | CSE453<br>CSE433   | AGCAGATGTAACTTACTGTG<br>ATTGACAACACTACTGAATAGGC |
| +10kb (+10.2kb)                    | CSE455<br>CSE435   | AGTGATGGTAATGTATCCTAG<br>ATACTTTGTGTGTCTTTCCCA  |
| +13kb (+13.4kb)                    | CSE458<br>CSE438   | CTGAGTGCTGAGAGAAGGGAA<br>TTGGCAGGCCTAATAGGTCAC  |
| +16kb (+16.1kb)                    | CSE4510<br>CSE4310 | GAGGTCCATCTACCTCTGCCT<br>AACTCTGGCGCTAACAGGTAG  |
| CSE2(+18kb)                        | CSE4511<br>CSE4311 | AATGCCAGTGGACTCCTCAGC<br>ACAGGGAATACAGCCTTGAAG  |
| CSE2 (+19kb)                       | IFN185<br>IFN183   | TCCAGTCTGTGGTTTGGCT<br>CTGATTCCAGGGCATAGCT      |
| +22kb (+22.4kb)                    | CSE256<br>CSE236   | AAGGCCAAAGAGTAAATGGGC<br>AAGTGTCTGCTTGGCATGCAG  |
|                                    |                    |                                                 |
