# Supplementary material
Source: PubMed Central journal article supplement (PMC515107)
Supplement: pnas_101_34_12622__2.pdf [file pnas_101_34_12622__2.pdf]

**A****IFN $\gamma$  promoter**

cctccattga agggcttcct caccacattg gctttttaac catacccttt ccttgctttt  
 ctggtcattt gcaagaaaag tttgaaaagg cttcccccac tgcatggttt gagaagccca  
 agagtttctc catggtttga gaagcccacg agtttccttt tattcagccg tccccaacca  
 caaaciaaagg ctccctgtgc tgtgctctgt ggatgagaaa ttcacattac aaggggcaaaa  
—————▶  
**T-box (conserved)**  
 agggggagac gtaaaagcaa tttccagccc ccaccccaa tggtgtgaag taaaagtgtc  
 ttcagagaat cccacaagaa tggcacaggt gggcacagcg gggctgtctc atcgtcagag  
◀—————  
**T-box**  
 agcccaagga gtcgaaagga aactctaaca tgccacaaaa ccatagctgt aatgcaaagt  
**T-box** **T-box**  
 aacttagctc cccccaccta tctgtcacca tcttaaaaaa aaaaaaaaaa caaaaaaaaaa  
**TATA-box**  
 cttgtgaaa a tacgtaatcc cgaggagcct tcgatcaggt ataaa actgg aagccagaga

**B****IFN $\gamma$ CNS1**

gaaaatgctc taacctatgg gataaatgag tcacgtggcg gggaaagtct gagtccgtgt  
 ggacttccat tctccacgct atgattcttc cgcaggccca gccctcatga tgtcaggagt  
 tccaggagtt caaccaacgt ggggggacct gatccagcac ttactcatac tgagtggaag  
 aaatctgtct gaacgggtgg aggaggtaac acgcggcggc tgctgatgta ggggaaaagc  
 gcaaccagga tgtaggtttt gtcttacaga ggaccgacct gctcagagtc ggggtccacag  
 agatactggt gaaatctccc tgttacatcc accaccagtt ttcagaaaaga aactctgaac  
—————▶  
**T-box (conserved)**  
 tgaaaggaaa aaagaaagt cgcagtcccc cccttttcta gtaatgcaat cacaccttgg  
 ctctcgtggtg ctttgccacg ggctttgaag gataccatgg tggcgattga ttctgcaggc  
**T-box (conserved)**  
 tcaactattg ccagactagc gaggtgtgaa acctctagtt tgcatgtaca acagaaagtg  
 ctttacaggc agcgcacaga gagatttctc tgtgacatta atgagacagg aaaaggtcag  
 aaaaggatgt gctattgggg tgacagcatt ctaaatacaga gaccctgtgc ccttaagagg  
◀—————
