# Supplementary material
Source: PubMed Central journal article supplement (PMC515107)

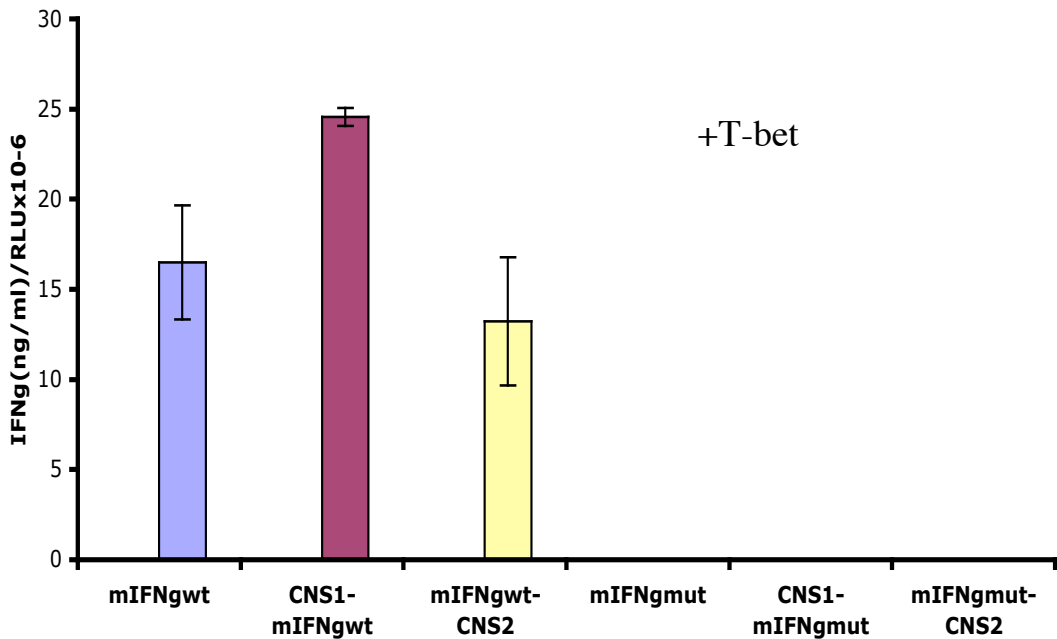

Supplement: pnas_101_34_12622__3.pdf [file pnas_101_34_12622__3.pdf]

**TH1**

**TH2**

**TH1noRT**

**TH2noRT**

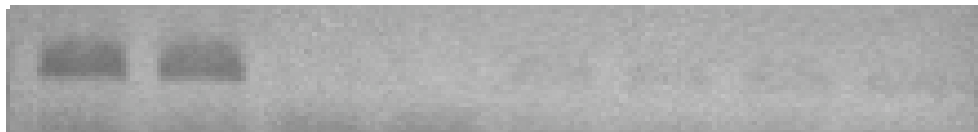

CNS1(-6kb)

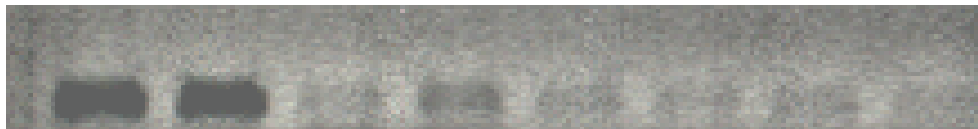

CNS2(+18kb)

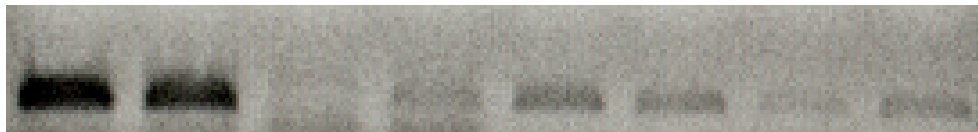

CNS2(+19kb)

Supplement: pnas_101_34_12622__4.pdf [file pnas_101_34_12622__4.pdf]
